# Supplementary material for: Clinical outcomes of myocarditis after SARS-CoV-2 mRNA vaccination in four Nordic countries: population based cohort study
Source: PubMed Central journal article supplement — BMJ Med. 2023 Feb 1;2(1):e000373. doi: 10.1136/bmjmed-2022-000373 (PMC9978676; doi:10.1136/bmjmed-2022-000373), 2023-02-01
Supplement: bmjmed-2022-000373supp002.pdf [file bmjmed-2022-000373supp002.pdf]

## SUPPLEMENTARY MATERIALS

### Clinical Outcomes Following SARS-CoV-2 mRNA Vaccine Myocarditis

#### Contents

|                                                                                                                                                                                                                                                                                                                 |    |
|-----------------------------------------------------------------------------------------------------------------------------------------------------------------------------------------------------------------------------------------------------------------------------------------------------------------|----|
| <b>Table S1.</b> Country-specific wash-out and follow-up periods. ....                                                                                                                                                                                                                                          | 2  |
| <b>Table S2.</b> ICD-10 codes used for defining heart failure and comorbidity. ....                                                                                                                                                                                                                             | 2  |
| <b>Table S3.</b> National registries used for obtaining clinical information, information on vaccinations, and information on tests for infectious diseases*. ....                                                                                                                                              | 3  |
| <b>Table S4.</b> Country-specific medians and interquartile ranges (IQR) of age by myocarditis type, age group, and country. ....                                                                                                                                                                               | 4  |
| <b>Table S5.</b> Relative risk of incident heart failure or death, as a combined outcome, within 90 days of follow-up since admission for new-onset myocarditis, by subgroup. ....                                                                                                                              | 5  |
| <b>Table S6.</b> Relative risk of readmission within 90 days of follow-up since discharge for new-onset myocarditis, by subgroup. ....                                                                                                                                                                          | 6  |
| <b>Table S7.</b> Relative risk of readmission within 90 days of follow-up since discharge for new-onset myocarditis and relative risk of heart failure or death within 90 days of follow-up since admission for new-onset myocarditis, by myocarditis subgroup using only pre-pandemic cases as reference. .... | 7  |
| <b>Figure S1.</b> Country-specific cumulative incidences of heart failure during follow-up. ....                                                                                                                                                                                                                | 8  |
| <b>Figure S2.</b> Country-specific cumulative incidences of death during follow-up. ....                                                                                                                                                                                                                        | 9  |
| <b>Figure S3.</b> Country-specific cumulative incidences of readmission during follow-up. ....                                                                                                                                                                                                                  | 10 |
| <b>Figure S4.</b> Cumulative incidence of readmission, combined from all countries, during follow-up. ....                                                                                                                                                                                                      | 11 |

**Table S1. Country-specific wash-out and follow-up periods.**

| Country | Wash-out period                                                                                            | Follow-up period             |
|---------|------------------------------------------------------------------------------------------------------------|------------------------------|
| Denmark | Three years prior to the date of admission (with Jan 1, 2015 as earliest date of potential wash-out)       | Jan 1, 2018 – Apr 30, 2022   |
| Finland | Three years prior to the date of admission (with Jan 1, 2015 as earliest date of potential wash-out)       | Jan 1, 2018 – March 13, 2022 |
| Norway  | One year prior to the date of admission (with January 1, 2017, as the earliest date of potential wash-out) | Jan 1, 2018 – April 27, 2022 |
| Sweden  | Three years prior to the date of admission (with Jan 1, 2015 as earliest date of potential wash-out)       | Jan 1, 2018 – Jan 31, 2022   |

**Table S2. ICD-10 codes used for defining heart failure and comorbidity.**

| Disease category       | ICD-10 codes                                                                                                                                                                                                                                                        |
|------------------------|---------------------------------------------------------------------------------------------------------------------------------------------------------------------------------------------------------------------------------------------------------------------|
| Heart failure          | I11.0, I13.0, I13.2, I42.0, I42.7, I43.0, I50, I50.0, I50.1, I50.2, I50.3, I50.4, I50.8, I50.9                                                                                                                                                                      |
| Autoimmune disease     | K50.x, K51.x, M32.x, M05.x-M06.x, E05.0, E06.3, G35.x, L40.x, E27.1, E27.2, G12.2, M45.x, M08.1, K90.0, M33.x, L52.x, G61.0, D59.0-D59.1, D69.0, D69.3, M08.x, L93.x, G70.0, D51.0, L12.x, M31.3, M30.0, K74.3, I00.x-01.x, D86.x, M34.x, M31.5-M31.6, L80.x, M35.x |
| Cardiovascular disease | I00-I99                                                                                                                                                                                                                                                             |
| Malignancy             | C00-C97                                                                                                                                                                                                                                                             |

**Table S3. National registries used for obtaining clinical information, information on vaccinations, and information on tests for infectious diseases\*.**

| Country | Clinical information registries                     | Vaccination information registries                        | Infectious disease registries                                              |
|---------|-----------------------------------------------------|-----------------------------------------------------------|----------------------------------------------------------------------------|
| Denmark | The Danish National Patient Register <sup>1</sup>   | The Danish Vaccination Register <sup>2</sup>              | The Danish Microbiology Database <sup>3</sup>                              |
| Finland | National Care Register for Health Care <sup>4</sup> | The National Vaccination Register <sup>5</sup>            | National Infectious Diseases Register <sup>6</sup>                         |
| Norway  | The Norwegian Patient Registry <sup>7</sup>         | The Norwegian Immunisation Register <sup>8</sup>          | Norwegian Surveillance System for Communicable Diseases                    |
| Sweden  | The Swedish Patient Register <sup>9</sup>           | The National Vaccination Register in Sweden <sup>10</sup> | Register on Surveillance of Notifiable Communicable Diseases <sup>11</sup> |

\* Information on linkage between individual national registries has been described previously<sup>12</sup>. Furthermore, the cohort study was carried out according to legal and ethical regulations within each participating country, as previously described in detail<sup>13</sup>.

**Table S4. Country-specific medians and interquartile ranges (IQR) of age by myocarditis type, age group, and country.**

| Country | All myocarditis cases (median, IQR) |            |              | Cases aged 12-39 years (median, IQR) |            |              |
|---------|-------------------------------------|------------|--------------|--------------------------------------|------------|--------------|
|         | Vaccine                             | COVID-19   | Conventional | Vaccine                              | COVID-19   | Conventional |
| Denmark | 31 (20-48)                          | 51 (41-61) | 37 (24-58)   | 23 (19-30)                           | -*         | 24 (19-30)   |
| Finland | 30 (18-48)                          | 30 (17-46) | 40 (26-57)   | 22 (17-30)                           | 18 (17-28) | 25 (20-32)   |
| Norway  | 33 (23-57)                          | 52 (36-66) | 44 (27-60)   | 24 (20-29)                           | 23 (19-36) | 26 (21-32)   |
| Sweden  | 28 (20-51)                          | 45 (30-59) | 37 (24-58)   | 21 (18-27)                           | 29 (25-33) | 24 (20-30)   |

\*Five or fewer cases.

**Table S5. Relative risk of incident heart failure or death, as a combined outcome, within 90 days of follow-up since admission for new-onset myocarditis, by subgroup.**

| <b>Myocarditis type by subgroup</b>         | Heart failure diagnosis or death within 90 days of admission | Total number of individuals | Relative risk of heart failure diagnosis or death within 90 days since admission |
|---------------------------------------------|--------------------------------------------------------------|-----------------------------|----------------------------------------------------------------------------------|
| <b>12–39 year olds</b>                      |                                                              |                             |                                                                                  |
| Vaccine myocarditis                         | 8                                                            | 340                         | 0.61 (0.30–1.24)                                                                 |
| COVID-19 myocarditis                        | 5                                                            | 48                          | 2.71 (1.16–6.31)                                                                 |
| Conventional myocarditis                    | 128                                                          | 3,327                       | 1 (ref.)                                                                         |
| <b>≥ 40 year olds</b>                       |                                                              |                             |                                                                                  |
| Vaccine myocarditis                         | 19                                                           | 190                         | 0.68 (0.44–1.05)                                                                 |
| COVID-19 myocarditis                        | 13                                                           | 61                          | 1.45 (0.89–2.37)                                                                 |
| Conventional myocarditis                    | 488                                                          | 3,326                       | 1 (ref.)                                                                         |
| <b>Men</b>                                  |                                                              |                             |                                                                                  |
| Vaccine myocarditis                         | 16                                                           | 413                         | 0.49 (0.30–0.81)                                                                 |
| COVID-19 myocarditis                        | 12                                                           | 76                          | 2.01 (1.19–3.41)                                                                 |
| Conventional myocarditis                    | 378                                                          | 4,815                       | 1 (ref.)                                                                         |
| <b>Women</b>                                |                                                              |                             |                                                                                  |
| Vaccine myocarditis                         | 11                                                           | 117                         | 0.73 (0.41–1.29)                                                                 |
| COVID-19 myocarditis                        | 6                                                            | 33                          | 1.40 (0.67–2.92)                                                                 |
| Conventional myocarditis                    | 238                                                          | 1,838                       | 1 (ref.)                                                                         |
| <b>Admitted on January 1, 2020 or later</b> |                                                              |                             |                                                                                  |
| Vaccine myocarditis                         | 27                                                           | 530                         | 0.54 (0.37–0.80)                                                                 |
| COVID-19 myocarditis                        | 18                                                           | 109                         | 1.77 (1.14–2.73)                                                                 |
| Conventional myocarditis                    | 265                                                          | 2,833                       | 1 (ref.)                                                                         |

**Table S6. Relative risk of readmission within 90 days of follow-up since discharge for new-onset myocarditis, by subgroup.**

| <b>Myocarditis type by subgroup</b>                     | <b>Readmission within 90 days of discharge</b> | <b>Total number of individuals</b> | <b>Relative risk of Readmission within 90 days since discharge</b> |
|---------------------------------------------------------|------------------------------------------------|------------------------------------|--------------------------------------------------------------------|
| <b>12–39 year olds</b>                                  |                                                |                                    |                                                                    |
| Vaccine myocarditis                                     | 26                                             | 340                                | 0.77 (0.52–1.12)                                                   |
| COVID-19 myocarditis                                    | 5                                              | 48                                 | 1.04 (0.45–2.41)                                                   |
| Conventional myocarditis                                | 332                                            | 3,326                              | 1 (ref.)                                                           |
| <b>≥ 40 year olds</b>                                   |                                                |                                    |                                                                    |
| Vaccine myocarditis                                     | 36                                             | 190                                | 0.96 (0.71–1.29)                                                   |
| COVID-19 myocarditis                                    | 4                                              | 61                                 | 0.33 (0.13–0.86)                                                   |
| Conventional myocarditis                                | 656                                            | 3,312                              | 1 (ref.)                                                           |
| <b>Men</b>                                              |                                                |                                    |                                                                    |
| Vaccine myocarditis                                     | 39                                             | 413                                | 0.72 (0.53–0.98)                                                   |
| COVID-19 myocarditis                                    | 5                                              | 76                                 | 0.50 (0.21–1.17)                                                   |
| Conventional myocarditis                                | 633                                            | 4,807                              | 1 (ref.)                                                           |
| <b>Women</b>                                            |                                                |                                    |                                                                    |
| Vaccine myocarditis                                     | 23                                             | 117                                | 1.01 (0.69–1.48)                                                   |
| COVID-19 myocarditis                                    | 4                                              | 33                                 | 0.63 (0.25–1.57)                                                   |
| Conventional myocarditis                                | 355                                            | 1,831                              | 1 (ref.)                                                           |
| <b>Admitted on January 1, 2020 or later</b>             |                                                |                                    |                                                                    |
| Vaccine myocarditis                                     | 62                                             | 530                                | 0.76 (0.59–0.98)                                                   |
| COVID-19 myocarditis                                    | 9                                              | 109                                | 0.49 (0.29–1.01)                                                   |
| Conventional myocarditis                                | 434                                            | 2,823                              | 1 (ref.)                                                           |
| <b>12–39 year olds without predisposing comorbidity</b> |                                                |                                    |                                                                    |
| Vaccine myocarditis                                     | 24                                             | 326                                | 0.82 (0.55–1.22)                                                   |
| COVID-19 myocarditis                                    | 5                                              | 47                                 | 1.18 (0.51–2.73)                                                   |
| Conventional myocarditis                                | 277                                            | 3,076                              | 1 (ref.)                                                           |

**Table S7. Relative risk of readmission within 90 days of follow-up since discharge for new-onset myocarditis and relative risk of heart failure or death within 90 days of follow-up since admission for new-onset myocarditis, by myocarditis subgroup using only pre-pandemic cases as reference.**

| <b>Myocarditis type</b>                  | Readmission within 90 days of discharge                      | Total number of individuals | Relative risk of readmission within 90 days since discharge                      |
|------------------------------------------|--------------------------------------------------------------|-----------------------------|----------------------------------------------------------------------------------|
| Vaccine myocarditis                      | 62                                                           | 530                         | 0.81 (0.63–1.03)                                                                 |
| COVID-19 myocarditis                     | 9                                                            | 109                         | 1.04 (0.30–1.07)                                                                 |
| Conventional myocarditis (pre-2020 only) | 554                                                          | 3,815                       | 1 (ref.)                                                                         |
| <b>Myocarditis type</b>                  | Heart failure diagnosis or death within 90 days of admission | Total number of individuals | Relative risk of heart failure diagnosis or death within 90 days since admission |
| Vaccine myocarditis                      | 27                                                           | 530                         | 0.55 (0.38–0.81)                                                                 |
| COVID-19 myocarditis                     | 18                                                           | 109                         | 1.80 (1.16–2.77)                                                                 |
| Conventional myocarditis (pre-2020 only) | 351                                                          | 3,820                       | 1 (ref.)                                                                         |

Figure S1. Country-specific cumulative incidences of heart failure during follow-up.

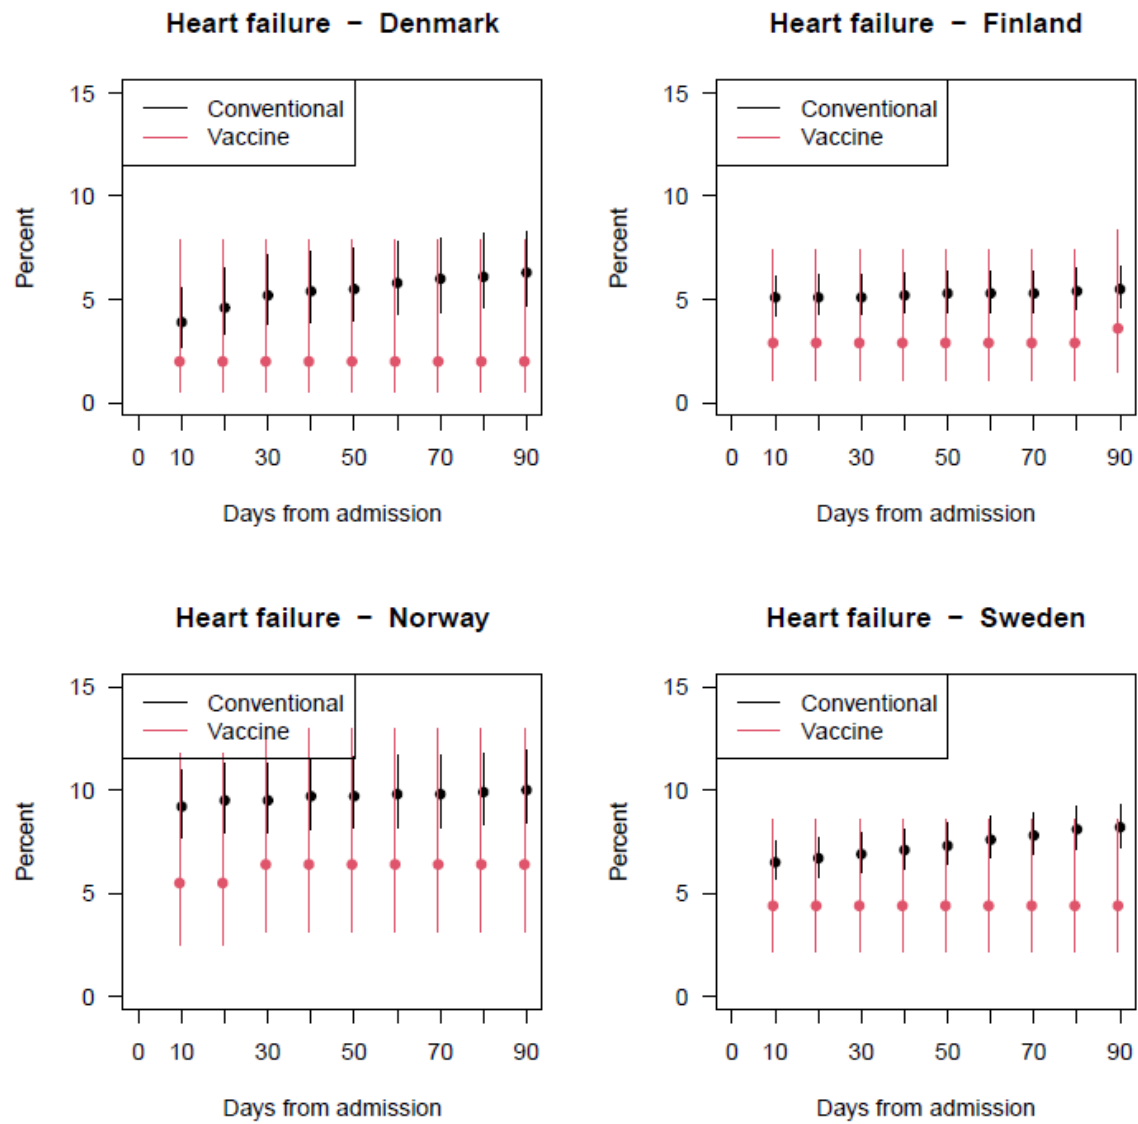



Figure S2. Country-specific cumulative incidences of death during follow-up.

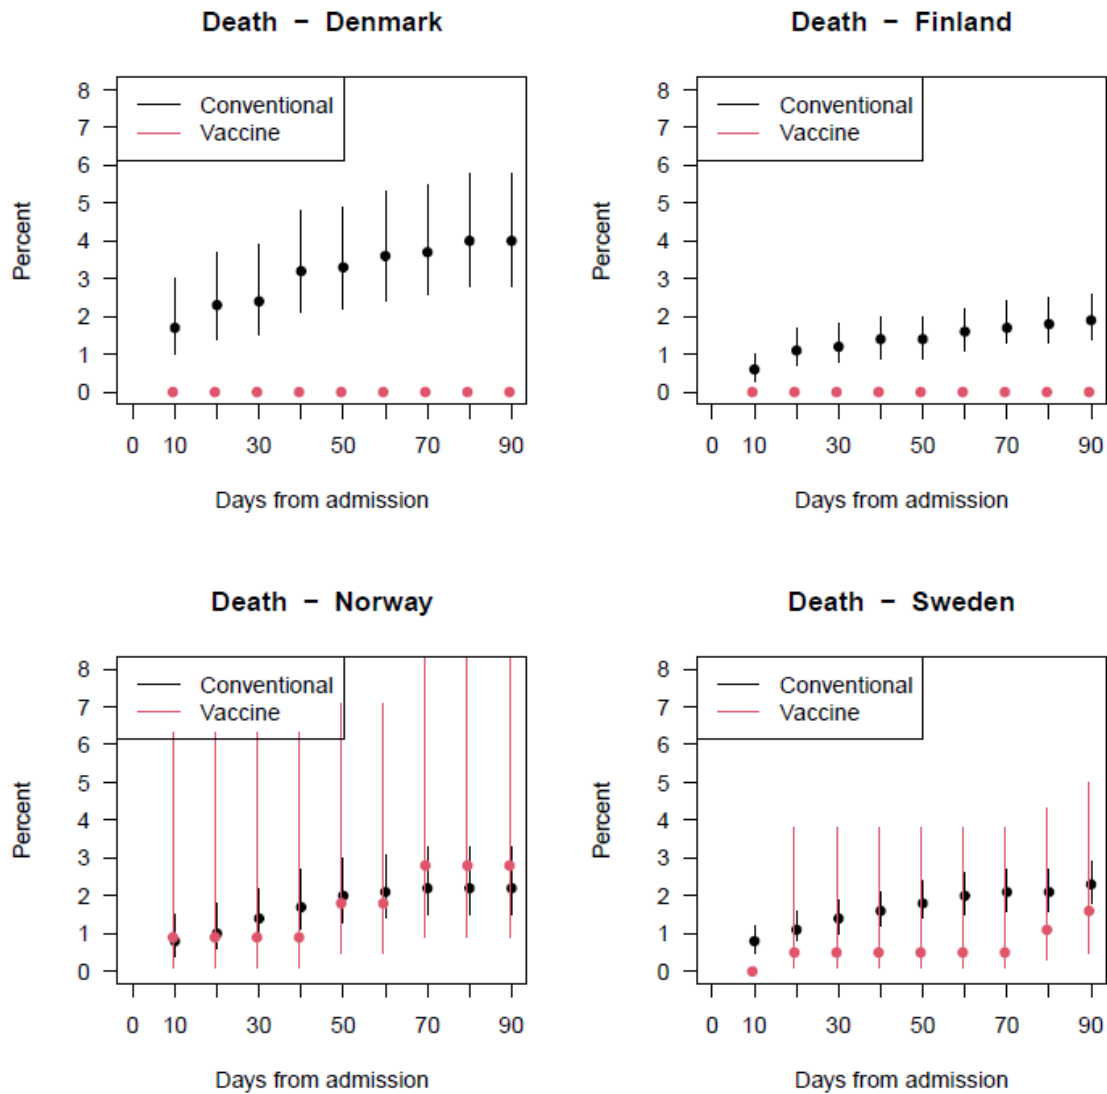

Figure S3. Country-specific cumulative incidences of readmission during follow-up.

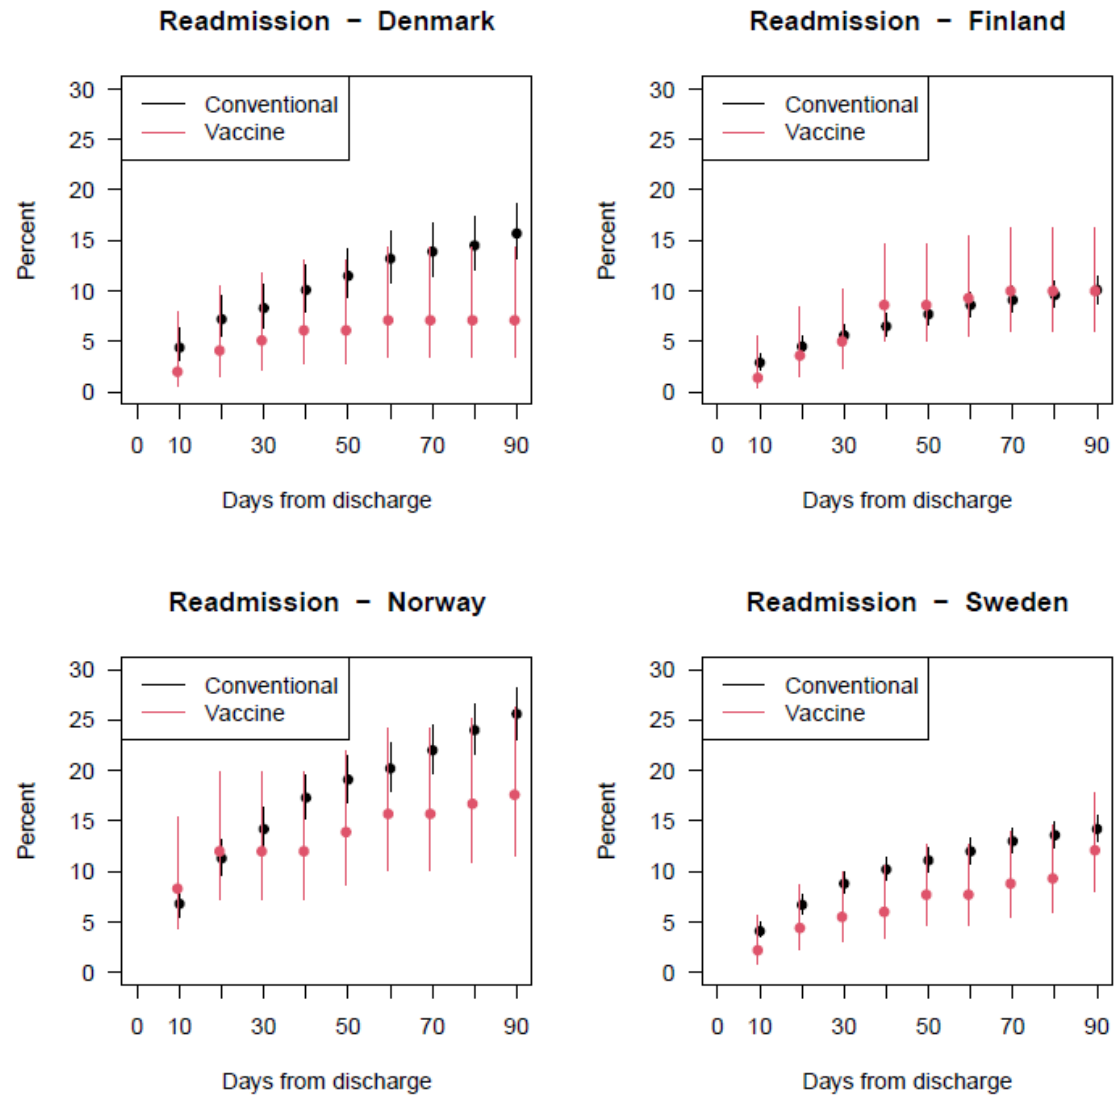

Figure S4. Cumulative incidence of readmission, combined from all countries, during follow-up.

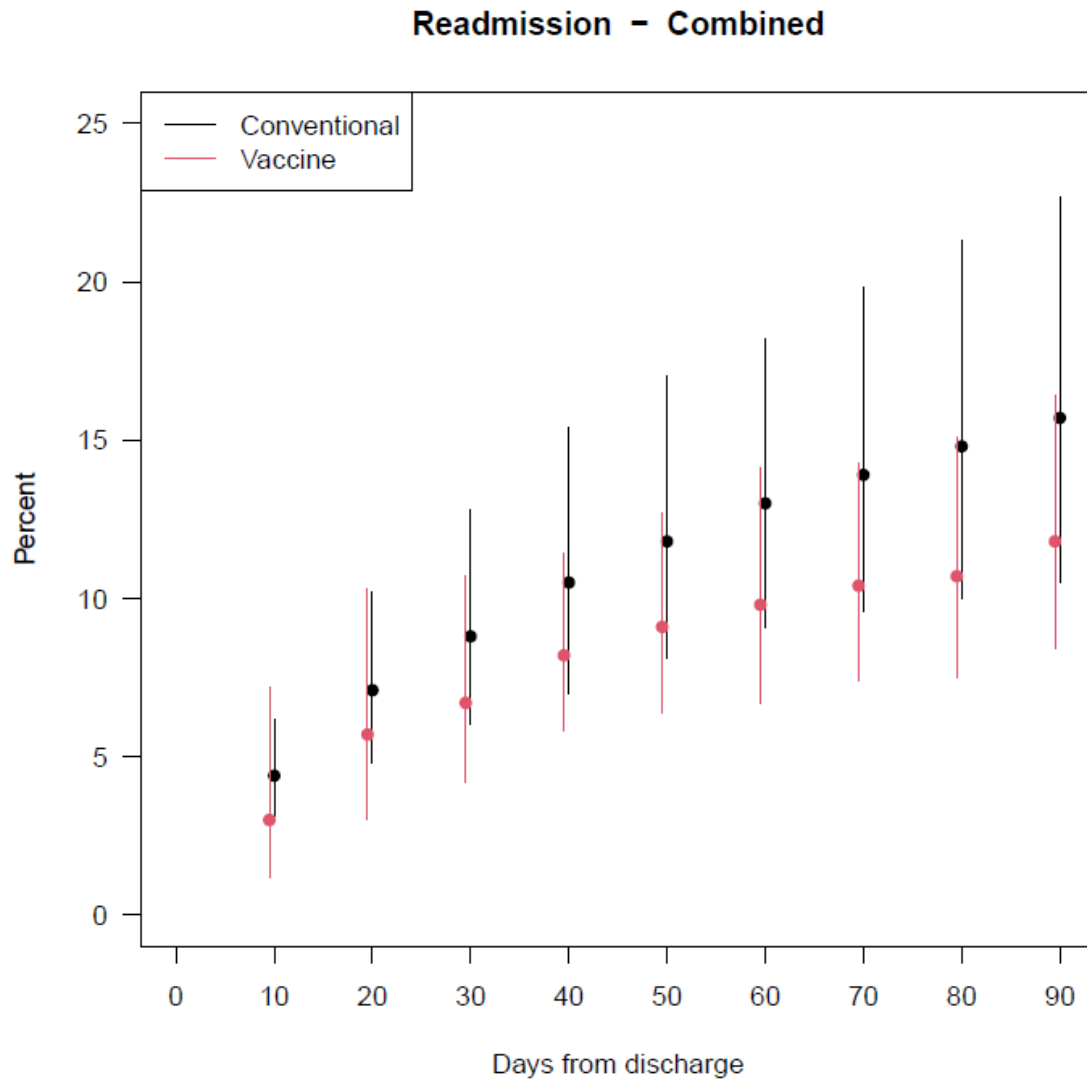

### Supplementary references

1. Schmidt M, Schmidt SAJ, Sandegaard JL, Ehrenstein V, Pedersen L, Sørensen HT. The Danish National Patient Registry: a review of content, data quality, and research potential. *Clin Epidemiol*. 2015;7:449-490. doi:10.2147/CLEP.S91125
2. Krause TG, Jakobsen S, Haarh M, Mølbak K. The Danish vaccination register. *Eurosurveillance*. 2012;17(17):20155. doi:10.2807/ESE.17.17.20155-EN
3. Voldstedlund M, Haarh M, Mølbak K, the MiBa Board of Representatives C. The Danish Microbiology Database (MiBa) 2010 to 2013. *Eurosurveillance*. 2014;19(1):20667. doi:10.2807/1560-7917.ES2014.19.1.20667
4. Care Register for Health Care - THL. Accessed November 5, 2021. <https://thl.fi/en/web/thlfi-en/statistics-and-data/data-and-services/register-descriptions/care-register-for-health-care>
5. Baum U, Sundman J, Jääskeläinen S, Nohynek H, Puumalainen T, Jokinen J. Establishing and maintaining the National Vaccination Register in Finland. *Euro Surveill*. 2017;22(17). doi:10.2807/1560-7917.ES.2017.22.17.30520
6. Finnish National Infectious Diseases Register - Infectious diseases and vaccinations - THL. Accessed November 5, 2021. <https://thl.fi/en/web/infectious-diseases-and-vaccinations/surveillance-and-registers/finnish-national-infectious-diseases-register>
7. Bakken IJ, Ariansen AMS, Knudsen GP, Johansen KI, Vollset SE. The Norwegian Patient Registry and the Norwegian Registry for Primary Health Care: Research potential of two nationwide health-care registries: <https://doi.org/10.1177/1403494819859737>. 2019;48(1):49-55. doi:10.1177/1403494819859737
8. Trogstad L, Ung G, Hagerup-Jenssen M, Cappelen I, Haugen IL, Feiring B. The norwegian

- immunisation register - SYSVAK. *Eurosurveillance*. 2012;17(16).  
doi:10.2807/ESE.17.16.20147-EN
9. Ludvigsson JF, Andersson E, Ekbom A, et al. External review and validation of the Swedish national inpatient register. *BMC Public Heal 2011 111*. 2011;11(1):1-16. doi:10.1186/1471-2458-11-450
  10. Chrapkowska C, Galanis I, Kark M, et al. Validation of the new Swedish vaccination register – Accuracy and completeness of register data. *Vaccine*. 2020;38(25):4104-4110.  
doi:10.1016/J.VACCINE.2020.04.020
  11. Rolfhamre P, Janson A, Arneborn M, Ekdahl K. SmiNet-2: Description of an internet-based surveillance system for communicable diseases in Sweden. *Eurosurveillance*. 2006;11(5):15-16. doi:10.2807/ESM.11.05.00626-EN
  12. Karlstad Ø, Hovi P, Husby A, et al. SARS-CoV-2 Vaccination and Myocarditis in a Nordic Cohort Study of 23 Million Residents. *JAMA Cardiol*. Published online April 20, 2022.  
doi:10.1001/JAMACARDIO.2022.0583
  13. Ludvigsson JF, Håberg SE, Knudsen GP, et al. Ethical aspects of registry-based research in the Nordic countries. *Clin Epidemiol*. 2015;7:491. doi:10.2147/CLEP.S90589
